# Supplementary material for: Pyrolysis of Denim Jeans Waste: Pyrolytic Product Modification by the Addition of Sodium Carbonate
Source: MDPI journal article supplement (doi:10.3390/polym14225035), 2022-11-21
Supplement: s1 [file s1]

Supplementary Materials

# Pyrolysis of Denim Jeans Waste: Pyrolytic Product Modification by the Addition of Sodium Carbonate

Junghee Joo<sup>1</sup>, Heeyoung Choi<sup>1</sup>, Kun-Yi Andrew Lin<sup>2</sup> and Jechan Lee<sup>1,3,\*</sup>

<sup>1</sup> Department of Global Smart City, Sungkyunkwan University, Suwon 16419, Republic of Korea

<sup>2</sup> Department of Environmental Engineering & Innovation and Development Center of Sustainable Agriculture, National Chung Hsing University, Taichung, Taiwan

<sup>3</sup> School of Civil, Architectural Engineering, and Landscape Architecture, Sungkyunkwan University, Suwon 16419, Republic of Korea

\* Correspondence: jechanlee@skku.edu

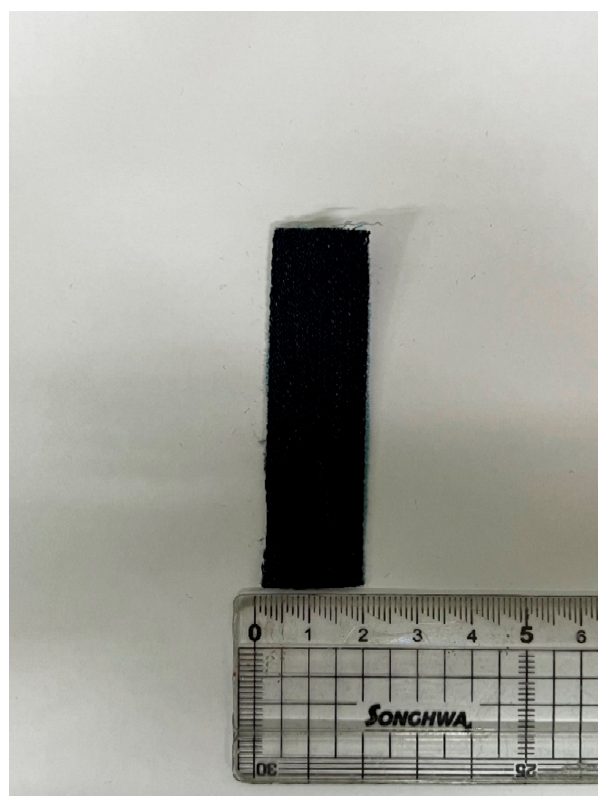

**Figure S1.** Denim jeans waste used as the feedstock in this study.

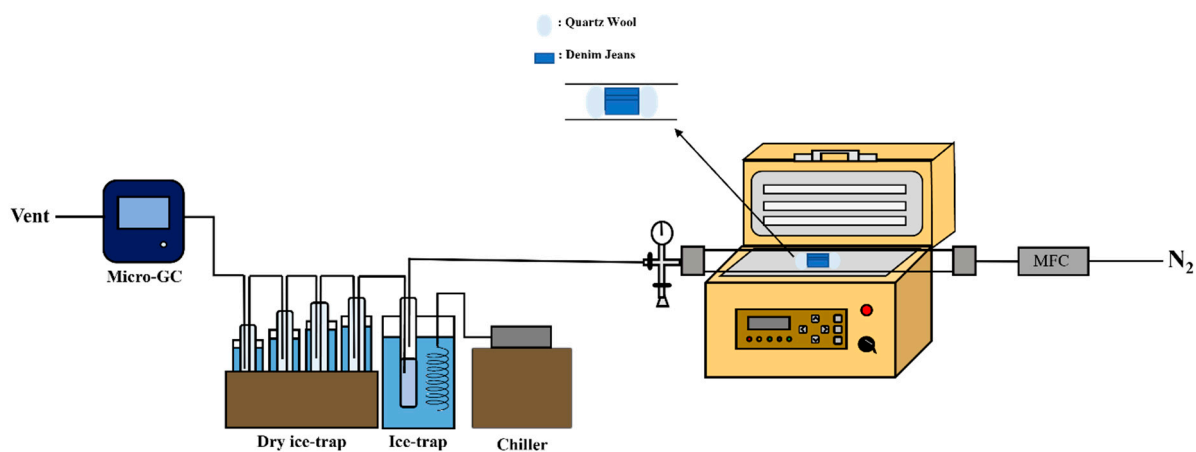

**Figure S2.** Scheme of the pyrolyser used for the pyrolysis of denim jeans waste.**Table S1.** Column information, and analytical conditions for the micro GC.

| Model               |                      | INFICON Fusion Gas Analyzer |                            |
|---------------------|----------------------|-----------------------------|----------------------------|
| Conditions          |                      | Module A                    | Module B                   |
| Column              |                      | Rt-Molsieve 5A              | Rt-Q-Bond                  |
| Sample Pump setting | Sample pump mode     | Continuous                  | Continuous                 |
|                     | Sample pump time     | 15 s                        | 15 s                       |
| Column setting      | Carrier gas          | Argon ( $\geq 99.999\%$ )   | Helium ( $\geq 99.999\%$ ) |
|                     | Column pressure      | 20 psi                      | 17 psi                     |
|                     | Initial temperature  | 50 °C (40 s)                | 50 °C (30 s)               |
|                     | Ramping time         | 50 s                        | 60 s                       |
|                     | Final temperature    | 100 °C (40 s)               | 110 °C (40 s)              |
|                     | Total analysis time  | 130 s                       | 130 s                      |
| Injector setting    | Injector temperature | 90 °C                       | 90 °C                      |
|                     | Inject time          | 30 ms                       | 30 ms                      |
| TCD setting         | TCD temperature      | 70 °C                       | 70 °C                      |
|                     | Data rate            | 50 Hz                       | 50 Hz                      |

**Table S2.** Column information, and analytical conditions for the GC/MS.

| Model            |                       | GC: Agilent 8890; MS: Agilent 5977B                                     |  |
|------------------|-----------------------|-------------------------------------------------------------------------|--|
| Column           |                       | HP-5MS Ultra Inlet column (0.25 mm $\times$ 0.25 $\mu$ m $\times$ 30 m) |  |
| Oven setting     | Initial temperature   | 30 °C (10 min)                                                          |  |
|                  | Ramping               | 5 °C min <sup>-1</sup>                                                  |  |
|                  | Final temperature     | 300 °C (10 min)                                                         |  |
|                  | Total analysis time   | 74 min                                                                  |  |
| Column setting   | Column flow           | 1 mL min <sup>-1</sup>                                                  |  |
|                  | Carrier gas           | Helium ( $\geq 99.999\%$ )                                              |  |
|                  | Carrier gas flow      | 3 mL min <sup>-1</sup>                                                  |  |
| Injector setting | Injection mode        | Splitless                                                               |  |
|                  | Injection volume      | 1 $\mu$ L                                                               |  |
|                  | Injection temperature | 280 °C                                                                  |  |
| MS setting       | m/z range             | 35~550 amu                                                              |  |
|                  | Aux temperature       | 300 °C                                                                  |  |
